# Supplementary material
Source: MDPI journal article supplement (https://www.mdpi.com/2071-1050/10/4/1293)
Supplement: s1 [file s1]

**Table S1.** The estimated weights and associated statistics for different spatial variables.

| <b>Conversion to ID</b> | <b>Weight</b> | <b>P-value</b> | <b>Conversion to CRD</b> | <b>Weight</b> | <b>P-value</b> |
|-------------------------|---------------|----------------|--------------------------|---------------|----------------|
| Constant                | 2.518         | 0.088          | Constant                 | 3.275         | 0.065          |
| Distance to city center | 0.731         | 0.062          | Distance to city center  | -1.063        | 0.046          |
| Distance to town center | 0.172         | 0.039          | Distance to town center  | -2.257        | 0.023          |
| Distance to LRT station | 0.361         | 0.028          | Distance to LRT station  | -3.781        | 0.031          |
| Distance to highway     | -0.429        | 0.036          | Distance to highway      | -1.985        | 0.086          |
| Distance to railway     | -0.517        | 0.043          | Distance to railway      | -1.220        | 0.035          |
| Distance to road        | -3.013        | 0.040          | Distance to road         | -2.746        | 0.069          |
| Area of ID              | 3.129         | 0.017          | Area of ID               | -1.277        | 0.021          |
| Area of CRD             | -3.672        | 0.029          | Area of CRD              | 6.714         | 0.009          |
| Area of RD              | -0.450        | 0.059          | Area of RD               | -0.638        | 0.016          |
| Area of OLU             | -0.237        | 0.071          | Area of OLU              | -0.143        | 0.028          |
| Current type: ID        | 2.546         | 0.015          | Current type: ID         | -2.831        | 0.116          |
| Current type: CRD       | -0.875        | 0.092          | Current type: CRD        | 5.089         | 0.012          |
| Current type: RD        | -0.207        | 0.074          | Current type: RD         | -0.216        | 0.043          |
| Current type: OLU       | -0.115        | 0.050          | Current type: OLU        | -1.011        | 0.035          |
| Slope                   | -2.317        | 0.043          | Slope                    | -2.266        | 0.037          |

**Table S1.** The estimated weights and associated statistics for different spatial variables

(Continued).

| Conversion to RD        | Weight | P-value | Conversion to OLU       | Weight | P-value |
|-------------------------|--------|---------|-------------------------|--------|---------|
| Constant                | 3.547  | 0.032   | Constant                | 0.386  | 0.109   |
| Distance to city center | 1.534  | 0.037   | Distance to city center | 0.051  | 0.070   |
| Distance to town center | 0.710  | 0.055   | Distance to town center | 1.257  | 0.039   |
| Distance to LRT station | 2.059  | 0.028   | Distance to LRT station | 2.142  | 0.041   |
| Distance to highway     | -2.581 | 0.053   | Distance to highway     | -0.853 | 0.029   |
| Distance to railway     | 0.640  | 0.071   | Distance to railway     | -2.670 | 0.052   |
| Distance to road        | -0.898 | 0.046   | Distance to road        | 0.741  | 0.033   |
| Area of ID              | -3.855 | 0.022   | Area of ID              | -2.851 | 0.061   |
| Area of CRD             | -5.296 | 0.040   | Area of CRD             | -5.189 | 0.020   |
| Area of RD              | 2.502  | 0.013   | Area of RD              | -1.135 | 0.047   |
| Area of OLU             | -2.961 | 0.036   | Area of OLU             | 2.982  | 0.034   |
| Current type: ID        | -1.137 | 0.053   | Current type: ID        | -0.214 | 0.083   |
| Current type: CRD       | -2.012 | 0.049   | Current type: CRD       | -1.871 | 0.052   |
| Current type: RD        | 1.520  | 0.028   | Current type: RD        | -0.576 | 0.039   |
| Current type: OLU       | -0.248 | 0.032   | Current type: OLU       | 2.259  | 0.020   |
| Slope                   | -1.028 | 0.060   | Slope                   | 0.022  | 0.027   |
